# Supplementary material
Source: PubMed Central journal article supplement (PMC2443663)
Supplement: supp_283_28_19176__1.pdf [file supp_283_28_19176__1.pdf]

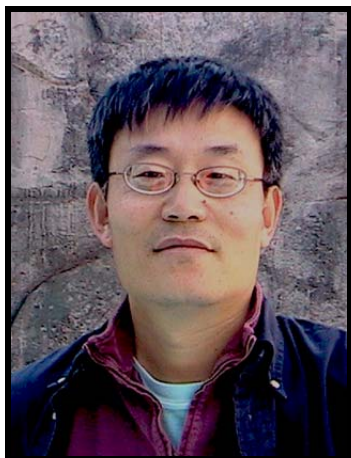

I was trained in mass spectrometry during my graduate studies at Baylor, and I have been using my expertise in mass spec to help study the DNA damage response pathway. My lab was among the first to report that SMC1 is involved in the checkpoint pathway, and since then I have continued to look at the role of the SMC family in DNA damage and repair.

**Current Position:** Associate Professor at the Departments of Biochemistry & Molecular Biology and Molecular & Cellular Biology at Baylor College of Medicine

**Education:** Ph.D. in Life Science (1996) from The Rockefeller University

**Non-scientific Interests:** Running, cooking and wine tasting

---

**Read Dr. Qin's article entitled:** Regulation of Intra-S Phase Checkpoint by Ionizing Radiation (IR)-dependent and IR-independent Phosphorylation of SMC3

<http://www.jbc.org/cgi/content/full/283/28/19176>
